# Supplementary material
Source: Springer Nature journal article supplement (https://www.springermedizin.de/resource/supplementary/13054_2014_2474_MOESM7_ESM.pdf/9714182)
Supplement: MOESM7 [file 9714182]

**Table 5 Complications of ECCO<sub>2</sub>R**

| Study                                 | Year | Modality        | Complication Rate | Description                                                                                                                                                                                         |
|---------------------------------------|------|-----------------|-------------------|-----------------------------------------------------------------------------------------------------------------------------------------------------------------------------------------------------|
| Bein T et al. <sup>19</sup>           | 2013 | AV <sup>a</sup> | 7.5 %             | 1 x lower limb ischaemia<br>2 x aneurysm                                                                                                                                                            |
| Neirhaus A et al. <sup>28</sup>       | 2011 | AV              | 21.4 %            | 2 x catheter displacement<br>1 x bleeding at insertion site                                                                                                                                         |
| Weber-Carstens S et al. <sup>25</sup> | 2009 | AV              | 6.3 %             | 1 x transient occlusion of femoral artery during cannulation                                                                                                                                        |
| Zimmermann M et al. <sup>20</sup>     | 2009 | AV              | 11.8%             | 3 x lower limb ischaemia<br>1 x cannula thrombosis<br>1 x bleeding during cannulation<br>1 x compartment syndrome                                                                                   |
| Terragni PP et al. <sup>22</sup>      | 2009 | VV <sup>b</sup> | 25%               | 1 x pump malfunction<br>3 x membrane/haemofilter clotting<br>1 x catheter displacement<br>3 x cannula problems                                                                                      |
| Muellenbach RM et al. <sup>26</sup>   | 2008 | AV              | 23%               | 2 x lower limb ischaemia<br>1 x femoral artery pseudoaneurysm<br>1 x lower limb amputation<br>1 x catheter displacement                                                                             |
| Bein T et al. <sup>27</sup>           | 2006 | AV              | 24.4%             | 9 x lower limb ischaemia<br>4 x cannula thrombosis<br>4 x compartment syndrome<br>2 x aneurysm<br>1 x haemolysis<br>1 x intracerebral haemorrhage<br>1 x diffuse bleeding with shock on cannulation |
| Liebold A et al. <sup>29</sup>        | 2002 | AV              | 21%               | 7 x cannula thrombosis<br>1 x membrane clotting<br>3 x lower limb ischaemia<br>5 x membrane plasma leakage                                                                                          |
| Guinard N et al. <sup>22</sup>        | 1997 | VV              | NR                | NR                                                                                                                                                                                                  |
| Morris AH et al. <sup>18</sup>        | 1994 | VV              | NR                | 21 x non-CNS haemorrhage (7 requiring discontinuation of ECCO2R)<br>4 x circuit clotting                                                                                                            |
| Brunet F et al. <sup>23</sup>         | 1994 | VV              | 18.2%             | 1 x alveolar haemorrhage<br>1 x diffuse bleeding                                                                                                                                                    |
| Bindslev et al. <sup>30</sup>         | 1991 | VV              | NR                | 1 x allergic reaction                                                                                                                                                                               |
| Gattinoni L et al. <sup>24</sup>      | 1986 | VV              | NR                | 3 x intra-pulmonary bleeding                                                                                                                                                                        |

<sup>a</sup> Arteriovenous<sup>b</sup> Venovenous
